# Supplementary material for: A&nbsp;multiple-trainee, multiple-level, multiple-competency (multi-TLC) simulation-based approach to training obstetrical emergencies
Source: Springer Nature journal article supplement (doi:10.1007/s40037-019-00534-7), 2019-10-07
Supplement: MOESM2 [file 17248714]

## OBSTETRICAL EMERGENCY SIMULATION – Second Responders

Obstetrical Emergency: PPH

Date:

Resident:

Evaluator:

### LEADERSHIP SKILLS

stays calm and in control during crisis  
prompt and firm decision-making  
Maintain global perspective ("Big picture")

### SITUATIONAL AWARENESS

Avoids fixation error  
Reassesses and re-evaluates situation constantly  
anticipates likely events

### INTERPROFESSIONAL COMMUNICATION SKILLS

Communicates clearly and concisely  
listens to team input

### PROBLEM SOLVING

Organized and efficient problem solving approach(ABC's)  
Quick in implementation ( Concurrent management)  
Considers alternatives during crisis

### RESOURCE UTILIZATION

Calls for help appropriately  
utilizes resources at hand appropriately  
Prioritizes tasks appropriately

### OVERALL

### OVERALL PERFORMANCE

| 1                                                     | 2 | 3                                                             | 4 | 5                                                    | 6 | 7                                                              |
|-------------------------------------------------------|---|---------------------------------------------------------------|---|------------------------------------------------------|---|----------------------------------------------------------------|
| Novice All CRM Skills require significant improvement |   | Advanced novice; many CRM skills require moderate improvement |   | Competent; most CRM skills require minor improvement |   | Clearly superior; few, if any skills require minor improvement |

### LEADERSHIP SKILLS

| 1                                                                                                                                    | 2 | 3                                                                                                                                      | 4 | 5                                                                                                                          | 6 | 7                                                                                       |
|--------------------------------------------------------------------------------------------------------------------------------------|---|----------------------------------------------------------------------------------------------------------------------------------------|---|----------------------------------------------------------------------------------------------------------------------------|---|-----------------------------------------------------------------------------------------|
| Loses calm and control for entire or most of crisis; unable to make firm decisions without delay; cannot maintain global perspective |   | Loses calm and control frequently during crisis; delays in making firm decisions (or with cueing); rarely maintains global perspective |   | Stays calm and in control for most of crisis; makes firm decisions with little delay; usually maintains global perspective |   | Remains calm and in control; makes prompt and firm; always maintains global perspective |

### PROBLEM SOLVING SKILLS

| 1                                                                                                                                | 2 | 3                                                                                                                                     | 4 | 5                                                                                                                                          | 6 | 7                                                                                           |
|----------------------------------------------------------------------------------------------------------------------------------|---|---------------------------------------------------------------------------------------------------------------------------------------|---|--------------------------------------------------------------------------------------------------------------------------------------------|---|---------------------------------------------------------------------------------------------|
| Cannot implement ABC's without cues; always uses sequential management approach despite cues; fails to consider any alternatives |   | Incomplete or slow ABC assessment; mostly uses sequential management approach unless cued; gives little consideration to alternatives |   | Satisfactory ABC assessment without cues; mostly uses concurrent management approach with only minimal cueing; considers some alternatives |   | Thorough yet quick ABCs; concurrent management approach; considers most likely alternatives |

### SITUATIONAL AWARENESS SKILLS

| 1                                                                                                                                                              | 2 | 3                                                                                                                                   | 4 | 5                                                                                                                            | 6 | 7                                                                                                 |
|----------------------------------------------------------------------------------------------------------------------------------------------------------------|---|-------------------------------------------------------------------------------------------------------------------------------------|---|------------------------------------------------------------------------------------------------------------------------------|---|---------------------------------------------------------------------------------------------------|
| Becomes fixated easily despite constantly repeated cues; fails to re-assess and re-evaluate situation despite repeated cues; fails to anticipate likely events |   | Avoids fixation error only with cueing; rarely reassesses and re-evaluates situation without cues; rarely anticipates likely events |   | Usually avoids fixation error with minimal cueing; reassesses & re-evaluates situation frequently with minimal cues; usually |   | Avoids any fixation error; reassesses and re-evaluates cues; constantly anticipates likely events |

anticipates likely events

RESOURCE UTILIZATION SKILLS

| 1                                                                                                     | 2 | 3                                                                                                                | 4 | 5                                                                                                                | 6 | 7                                                                                                           |
|-------------------------------------------------------------------------------------------------------|---|------------------------------------------------------------------------------------------------------------------|---|------------------------------------------------------------------------------------------------------------------|---|-------------------------------------------------------------------------------------------------------------|
| Unable to use resources & staff; does not prioritize tasks or ask for help when required despite cues |   | Able to use resources with minimal effectiveness; only prioritize tasks or asks for help when required with cues |   | Able to use resources with moderate effectiveness; able to prioritize task and/or ask for help with minimal cues |   | Clearly able to utilize Resources effectively; sets clear task priorities; asks for help early with no cues |

INTERPROFESSIONAL COMMUNICATION SKILLS

| 1                                                                                                                                              | 2 | 3                                                                                                                                                                        | 4 | 5                                                                                                                                    | 6 | 7                                                                                              |
|------------------------------------------------------------------------------------------------------------------------------------------------|---|--------------------------------------------------------------------------------------------------------------------------------------------------------------------------|---|--------------------------------------------------------------------------------------------------------------------------------------|---|------------------------------------------------------------------------------------------------|
| Does not communicate with team concisely at all times; does not acknowledge team feedback, never uses directed verbal/non-verbal communication |   | Communicates occasionally with team but, unclear and vague; occasionally listens to but rarely interacts with team; rarely uses directed verbal/non-verbal communication |   | Communicates with team clearly and concisely most of the time; listens to team feedback; usually uses verbal/nonverbal communication |   | Communicates clearly and encourages input and listens consistently uses directed communication |

PATIENT COMMUNICATION SKILLS

| 1                                                                                                                 | 2 | 3                                                                                                                              | 4 | 5                                                                                                                                   | 6 | 7                                                                                                      |
|-------------------------------------------------------------------------------------------------------------------|---|--------------------------------------------------------------------------------------------------------------------------------|---|-------------------------------------------------------------------------------------------------------------------------------------|---|--------------------------------------------------------------------------------------------------------|
| Does not listen to patient/family; does not allow patient/family to express their feelings; does not show empathy |   | Occasionally actively listens to patients/family; rarely allows patient/family to express their feelings; rarely shows empathy |   | Usually listens to patient/family; allows patient/family to express their feelings most of the time; is empathetic most of the time |   | Always listens to patient/family; allows patient/family to express their feeling; always shows empathy |
